# Supplementary material for: Evaluating Antivenom Efficacy against Echis carinatus Venoms—Screening for In Vitro Alternatives
Source: MDPI journal article supplement (doi:10.3390/toxins14070481), 2022-07-13
Supplement: s1 [file s1]

Supplementary materials

# Evaluating Antivenom Efficacy against *Echis carinatus* Venoms—Screening for In Vitro Alternatives

Siddharth Bhatia <sup>†</sup>, Avni Blotra <sup>†</sup> and Karthikeyan Vasudevan <sup>\*</sup>

CSIR-Centre for Cellular and Molecular Biology, Laboratory for the Conservation of Endangered Species, Hyderabad, India; sid-dharth.bhatia17@hotmail.com (S.B.); avniblotra76@gmail.com (A.B.)

<sup>\*</sup> Correspondence: karthik@ccmb.res.in

<sup>†</sup> These authors contributed equally to this work.

**Table S1.** Binding parameters for hyperbolic curve fitted AUC vs Antivenom-venom amounts plot (Figure 2) are listed above where AUC<sub>max</sub> is the asymptotic maxima for AUC<sub>Z1</sub> and EC50 is antivenom-venom ratio at which AUC<sub>Z1</sub> was half the AUC<sub>max</sub>.

|                                    | ECVTN          | ECVGO          | ECVRAJ         |
|------------------------------------|----------------|----------------|----------------|
| <b>Best-fit values</b>             |                |                |                |
| AUC <sub>max</sub>                 | 600.1          | 262.4          | 467.4          |
| EC50                               | 118.2          | 92.73          | 177.4          |
| <b>95% CI (profile likelihood)</b> |                |                |                |
| AUC <sub>max</sub>                 | 463.0 to 897.0 | 187.1 to 456.2 | 399.1 to 569.5 |
| EC50                               | 70.94 to 229.4 | 45.19 to 238.8 | 136.5 to 239.9 |
| <b>Goodness of Fit</b>             |                |                |                |
| Degrees of Freedom                 | 22             | 22             | 14             |
| R squared                          | 0.9562         | 0.87           | 0.9953         |

**Table S2.** Number of F(ab)<sub>2</sub> molecules per venom toxin is estimated using the formula described in methodology section 2.2. Average molecular weight of toxin for each venom group was estimated by densitometry analysis of SDS-PAGE bands reported in (Bhatia and Vasudevan, 2020). Molecular weight of F(ab)<sub>2</sub> molecules were taken as 110 kDa.

| Venom  | Avg molecular weight (in kDa) | Venom amount (in ng) | Venom amount in nmols (Ag) | Max antivenom bound (in ng) | Amount of antibody in nmols (Ab) | Number of antibodies per venom toxins (Ab/Ag) |
|--------|-------------------------------|----------------------|----------------------------|-----------------------------|----------------------------------|-----------------------------------------------|
| ECVTN  | 45.16                         | 10000                | 0.22                       | 95700                       | 0.87                             | 4.0                                           |
| ECVGO  | 55.19                         | 10000                | 0.18                       | 13400                       | 0.122                            | 0.67                                          |
| ECVRAJ | 33.66                         | 10000                | 0.30                       | 62300                       | 0.566                            | 1.89                                          |

**Table S3.** Clotting times (CT) for different amounts of venoms. Clotting times were estimated from the plasma of two healthy donors and readings were taken in triplicate for each plasma.

|        |  | Venom amount in µg |      |      |       |       |
|--------|--|--------------------|------|------|-------|-------|
|        |  | 10                 | 5    | 2.5  | 1.3   | 0.6   |
| ECVRAJ |  | 26.9               | 37.3 | 62.7 | 90.4  | 165   |
|        |  | 26.4               | 36.5 | 57.2 | 92.8  | 165.3 |
|        |  | 25.5               | 35.5 | 60.5 | 104.1 | 221.8 |
|        |  | 29.4               | 44   | 69.5 | 114.6 | 227.3 |
|        |  | 30                 | 43.4 | 72.4 | 109.5 | 239.2 |
|        |  | 30.8               | 47   | 66   | 123.4 | 347.5 |
| ECVTN  |  | 20                 | 28.8 | 41.6 | 66    | 100   |
|        |  | 23.5               | 29   | 45   | 67    | 121   |

---

|       |      |      |      |      |       |
|-------|------|------|------|------|-------|
|       | 21.5 | 30   | 43.7 | 67   | 120   |
|       | 22.5 | 29.7 | 44.3 | 64.9 | 104.7 |
|       | 22.6 | 29.7 | 45.2 | 70.6 | 112.5 |
|       | 21.3 | 30.1 | 47.7 | 72   | 120.8 |
|       | 18.6 | 20.5 | 28.2 | 38.3 | 60.4  |
|       | 16.6 | 21   | 28.2 | 42.8 | 63.3  |
| ECVGO | 16.4 | 22.2 | 27.2 | 39.9 | 57.4  |
|       | 15.6 | 20.7 | 28.8 | 42.5 | 62.8  |
|       | 15.1 | 19.8 | 27.2 | 40.8 | 57.5  |
|       | 16.1 | 19.9 | 27.1 | 37.1 | 55.4  |

---

**Table S4.** Fold change in the clotting times (CT) for different antivenom-venom ratios are represented in the table above. It is calculated by dividing CT of antivenom-venom dilution with CT of challenge dose of venom (2\*MCD). The readings were taking in triplicates for the plasma from 2 volunteers.

|        |              | Antivenom-venom Ratios |      |        |        |
|--------|--------------|------------------------|------|--------|--------|
|        | 100:1        | 50:1                   | 25:1 | 12.5:1 | 6.25:1 |
| ECVRAJ | no clot seen | 8.01                   | 2.14 | 1.22   | 1.01   |
|        |              | 8.3                    | 2.03 | 1.24   | 1.06   |
|        |              | 7.76                   | 1.97 | 1.23   |        |
|        |              | 8.82                   | 2.08 | 1.25   | 1.04   |
|        |              | 8.82                   | 2.12 | 1.34   | 1.02   |
| ECVTN  | 4.91         | 2.17                   | 1.38 | 1.25   | 1.14   |
|        | 5.04         | 2.15                   | 1.35 | 1.21   | 1.13   |
|        | 5.25         | 2.13                   | 1.32 | 1.26   | 1.2    |
|        | 5.82         | 2.43                   | 1.41 | 1.14   | 1.04   |
|        | 5.23         | 2.41                   | 1.52 | 1.14   | 1.07   |
|        | 5.74         | 2.44                   | 1.41 | 1.17   | 1.08   |
| ECVGO  | 9.08         | 4.84                   | 1.6  | 1.37   | 1.22   |
|        | 8.22         | 4.4                    | 1.41 | 1.21   | 1.07   |
|        | 7.79         | 3.99                   | 1.35 | 1.29   | 1.07   |
|        | 8.97         | 3.74                   | 1.47 | 1.2    | 1.15   |
|        | 8.35         | 3.53                   | 1.42 | 1.08   | 0.98   |
|        | 8.91         | 3.7                    | 1.45 | 1.15   | 1.09   |

**Table S5.** Percentage decrease in proteolytic activity referred as %R were estimated using formula described in methodology section 2.3.2. The table represents %R (n=3 for ECVTN and ECVGO; n=2 for ECVRAJ) for different antivenom-venom ratios.

| Antivenom-venom ratio | ECVTN |       |       | ECVGO |       |       | ECVRAJ |       |
|-----------------------|-------|-------|-------|-------|-------|-------|--------|-------|
| 168:1                 | 72.80 | 75.54 | 74.60 | 72.34 | 64.33 | 70.17 | 23.93  | 38.08 |
| 84:1                  | 69.65 | 65.00 | 63.99 | 65.15 | 40.01 | 58.97 | 36.35  | 25.74 |
| 42:1                  | 46.64 | 43.26 | 46.47 | 50.38 | 11.28 | 28.61 | 14.75  | 23.03 |
| 21:1                  | 41.11 | 36.65 | 28.12 | 32.17 | 14.00 | 24.59 | 22.12  | 22.12 |
| 11.5:1                | 25.31 | 26.54 | 15.85 | 19.01 | 3.29  | 6.35  | -1.46  | 8.17  |
| 5.75:1                | 18.87 | 19.96 | 9.91  | 16.52 | 12.06 | 5.95  | 5.31   | 0.49  |

**Table S6.** Percentage decrease in PLA<sub>2</sub> activity (%R) calculated by the formula described in methodology section 2.3.2. at different antivenom-venom ratio is represented for each venom group (n=3 for ECVTN and ECVGO; n=2 for ECVRAJ).

| Antivenom-venom ratio |       | ECVTN |       |       | ECVGO |       | ECVRAJ |       |
|-----------------------|-------|-------|-------|-------|-------|-------|--------|-------|
| 100:1                 | 89.79 | 94.40 | 96.55 | 95.72 | 96.42 | 96.86 | 15.08  | 28.51 |
| 50:1                  | 93.65 | 95.38 | 96.43 | 77.05 | 74.28 | 73.91 | 22.25  | 47.43 |
| 25:1                  | 89.13 | 90.76 | 92.37 | 55.33 | 60.60 | 66.12 | 13.66  | 25.54 |
| 12.5:1                | 62.82 | 69.94 | 69.14 | 22.37 | 28.69 | 32.41 | 13.62  | 25.35 |
| 6.25:1                | 52.90 | 52.39 | 55.53 | 28.78 | 18.18 | 18.25 | 24.57  | 21.40 |

**Table S7.** Parameters for sigmoidal curve fitted to the %R vs Log(antivenom-venom ratio) plot are represented in the table. %R<sub>max</sub> is maximum reduction in the activity and IC<sub>50</sub> is antivenom-venom ratio at which %R<sub>max</sub> is half.

| List of assays         | Venom  | Curve fitting parameters |                  |           |
|------------------------|--------|--------------------------|------------------|-----------|
|                        |        | %R <sub>max</sub>        | IC <sub>50</sub> | R squared |
| PLA <sub>2</sub> Assay | ECVTN  | 94.42                    | 14.39            | 0.983     |
|                        | ECVGO  | 105.70                   | 27.38            | 0.965     |
|                        | ECVRAJ | 27.32                    | Unstable         | 0.153     |
| Proteolytic assay      | ECVTN  | 86.97                    | 42.35            | 0.964     |
|                        | ECVGO  | 81.88                    | 64.79            | 0.837     |
|                        | ECVRAJ | 32.51                    | 18.76            | 0.764     |
| Coagulation assay      | ECVTN  | 102.60                   | 43.90            | 0.991     |
|                        | ECVGO  | 100.10                   | 28.86            | 0.994     |
|                        | ECVRAJ | 101.50                   | 24.61            | 0.995     |
